# Supplementary material for: Unveiling the inhibition mechanism of host-defense peptide cathelicidin LL-37 on the amyloid aggregation of the human islet amyloid polypeptide
Source: Royal Society of Chemistry journal article supplement (doi:10.1039/d4nr05075d), 2025-01-01
Supplement: d4nr05075d1.pdf [file d4nr05075d1.pdf]

**Supplementary information for**

**Unveiling the inhibition mechanism of host-defense peptide  
cathelicidin LL-37 on the amyloid aggregation of human islet  
amyloid polypeptide**

Huayuan Tang<sup>1,2,\*</sup>

<sup>1</sup> Department of Engineering Mechanics, Hohai University, Nanjing 211100, P.R. China

<sup>2</sup> State Key Laboratory of Structural Analysis, Optimization and CAE Software for Industrial  
Equipment, Dalian University of Technology, Dalian 116024, P.R. China

**\*Corresponding Author**

Email: Huayuan Tang, [htang@hhu.edu.cn](mailto:htang@hhu.edu.cn)

;

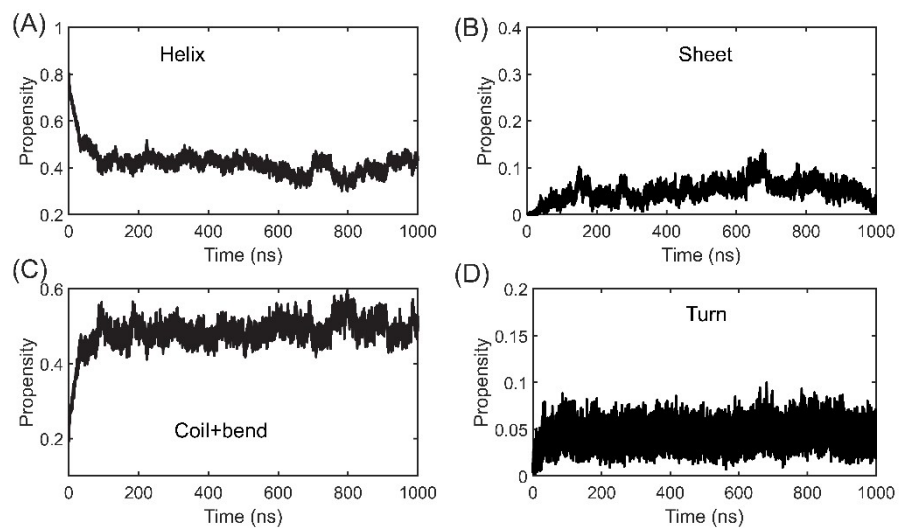

**Figure S1. Variations of the secondary structure propensities of LL37 monomer as a function of time. (A) Helix, (B)  $\beta$ -sheet, (C) coil and bend, and (D) turn structures.**

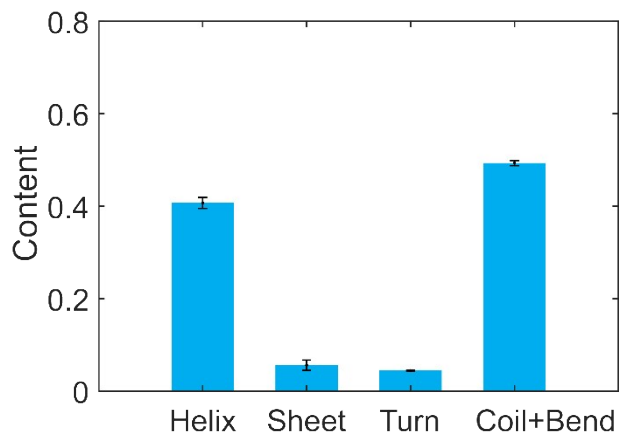

**Figure S2. Secondary structure contents of the monomeric LL37 peptide.**

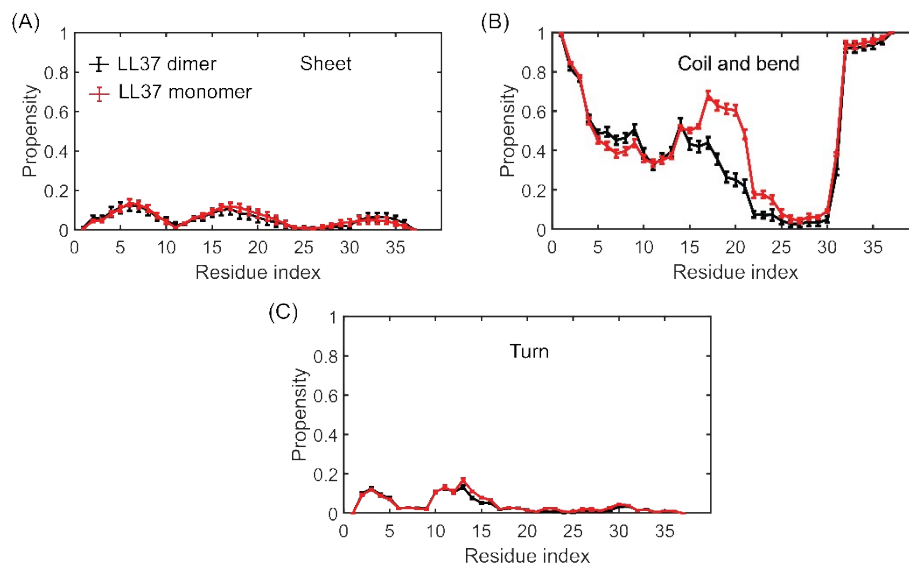

**Figure S3. Secondary structure propensities of each LL37 residue for the LL37 monomer and dimer.** (A)  $\beta$ -sheet; (B) coil and bend; (C) turn structure.

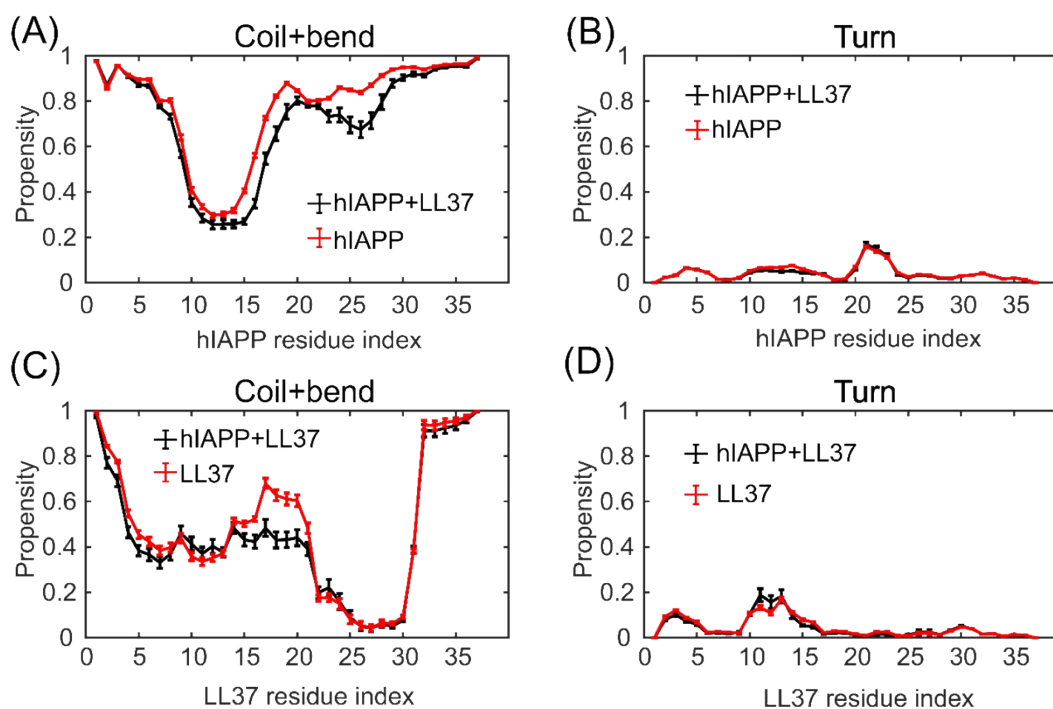

**Figure S4. Secondary structure propensities of each residue.** (A) Coil and bend, and (B) propensities of each hIAPP residue for the system with hIAPP:LL37=1:1 and monomeric hIAPP. (C) Coil and bend, and (D) propensities of each LL37 residue for the system with hIAPP:LL37=1:1 and monomeric LL37.

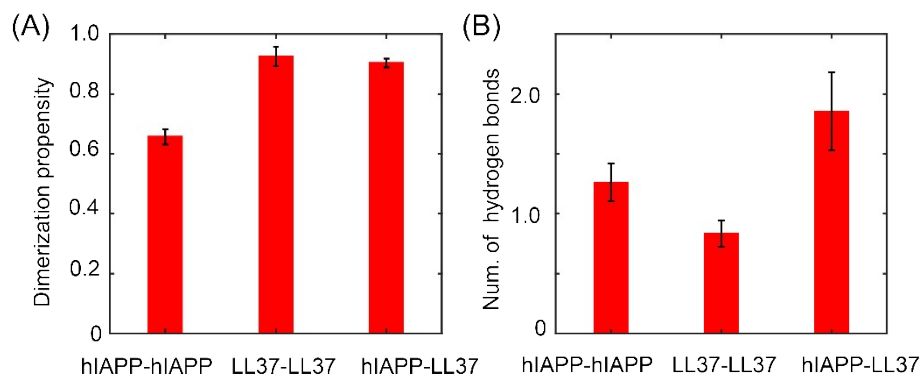

**Figure S5.** (A) Dimerization propensities of hIAPP-hIAPP, LL37-LL37, and hIAPP-LL37 systems. (B) Ensemble-averaged Number of hydrogen bonds for the systems with hIAPP-hIAPP, LL37-LL37, and hIAPP-LL37.

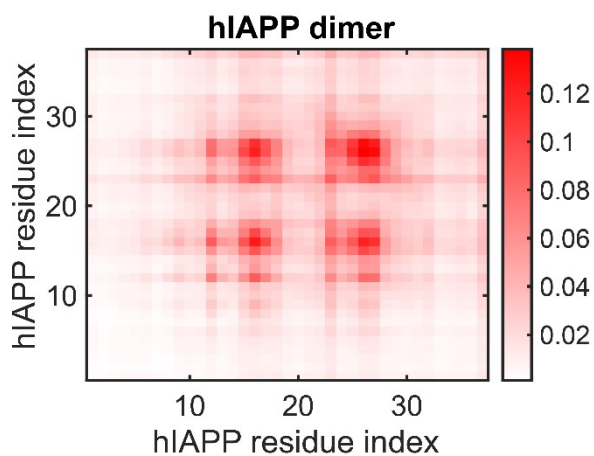

**Figure S6.** Inter-peptide contact frequency between each hIAPP residue during the dimerization of hIAPP peptides.
